# Supplementary material for: Electrocatalytic activity of cobalt Schiff base complex immobilized silica materials towards oxygen reduction and hydrazine oxidation
Source: Royal Society of Chemistry journal article supplement (doi:10.1039/c2cy20465g), 2012-01-01
Supplement: c2cy20465g.pdf [file c2cy20465g.pdf]

*Electronic supplementary information (ESI) for*

**Electrocatalytic activity of cobalt Schiff base complex immobilized silica materials towards oxygen reduction and hydrazine oxidation**

**Manas Pal and Vellaichamy Ganesan\***

*Department of Chemistry, Faculty of Science, Banaras Hindu University*

*Varanasi-221 005, UP, India*

*Tel.: + 91-542-2307321; Fax: + 91-542-2368127.*

*E-mail address: velganesh@yahoo.com and velgan@bhu.ac.in*

*\* Corresponding author*

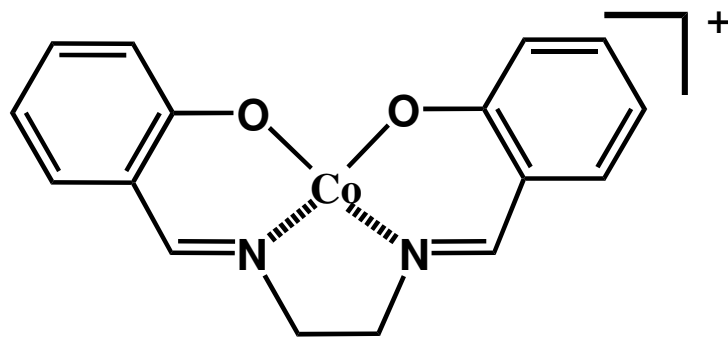

**Co(salen)**

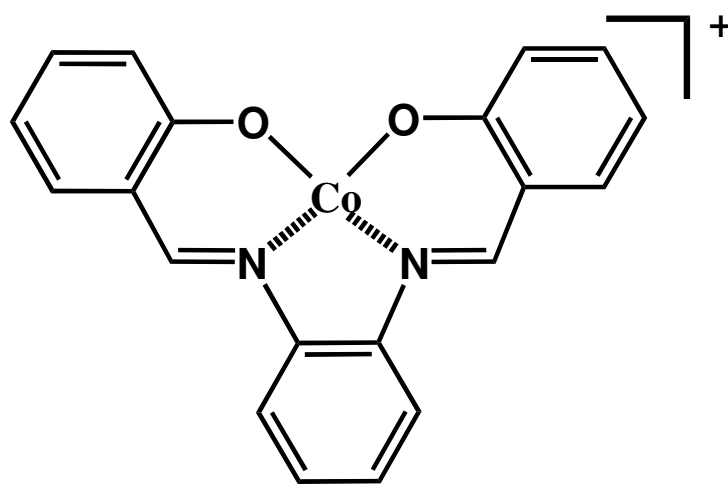

**Co(salophen)**

**Fig. S1:** Scheme representing the structure of Co(salen) and Co(salophen)

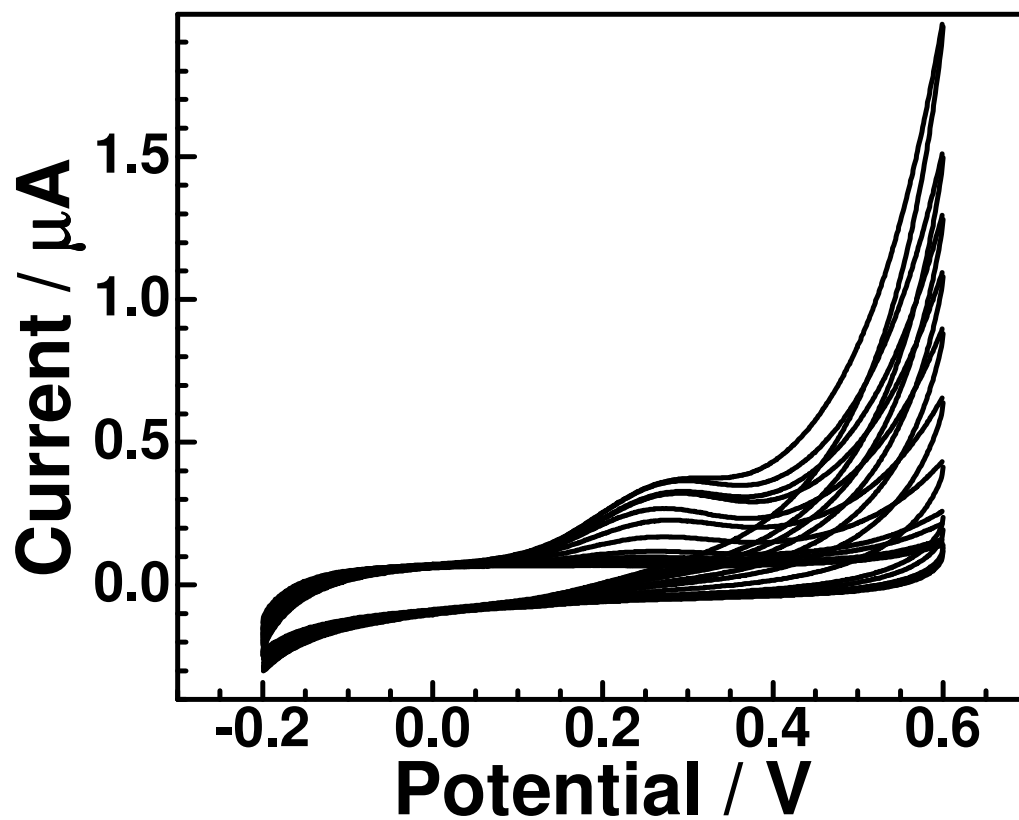

**Fig. S2:** Cyclic voltammograms of GC/MSS-Co(salen) electrode with different concentrations of HZ (1.0, 5.0, 10.0, 30.0, 50.0, 100.0, 200.0, 300.0, 400.0, 500.0, 600.0 and 1000.0  $\mu\text{M}$ ).

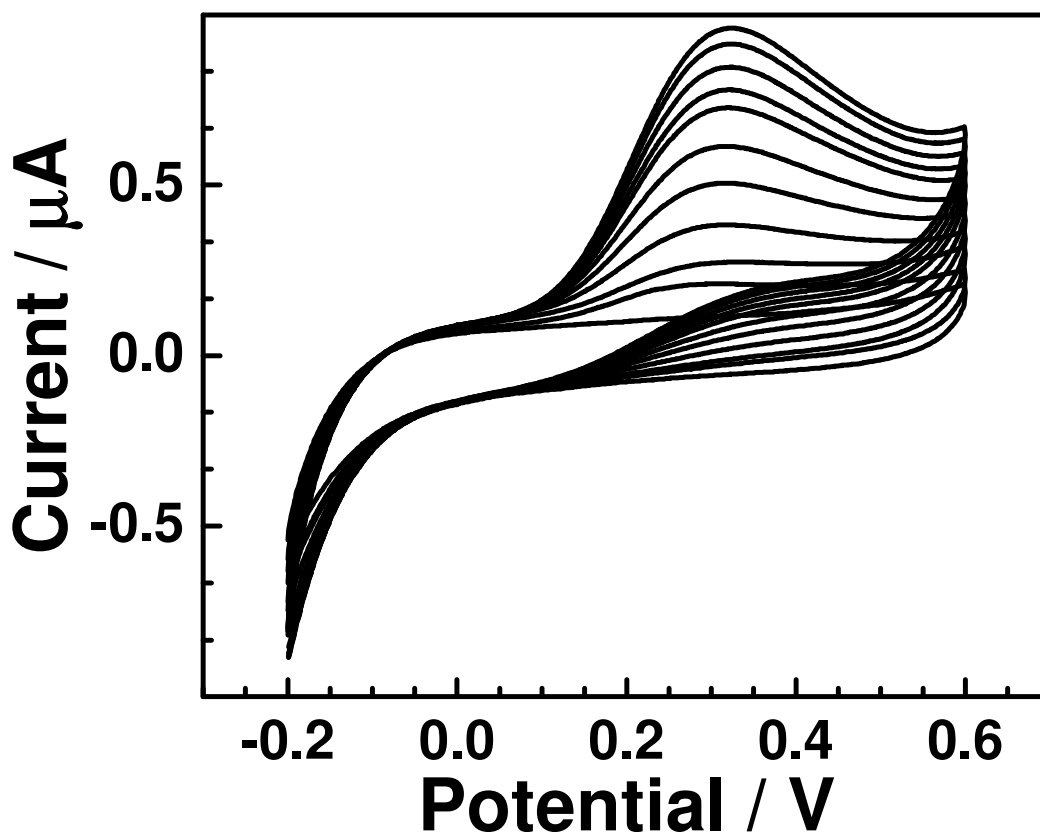

**Fig. S3:** Cyclic voltammograms of GC/MSS-Co(salophen) electrode with different concentrations of HZ (1.0, 5.0, 10.0, 15.0, 20.0, 25.0, 30.0, 35.0, 40.0, 45.0 and 50.0  $\mu\text{M}$ ).

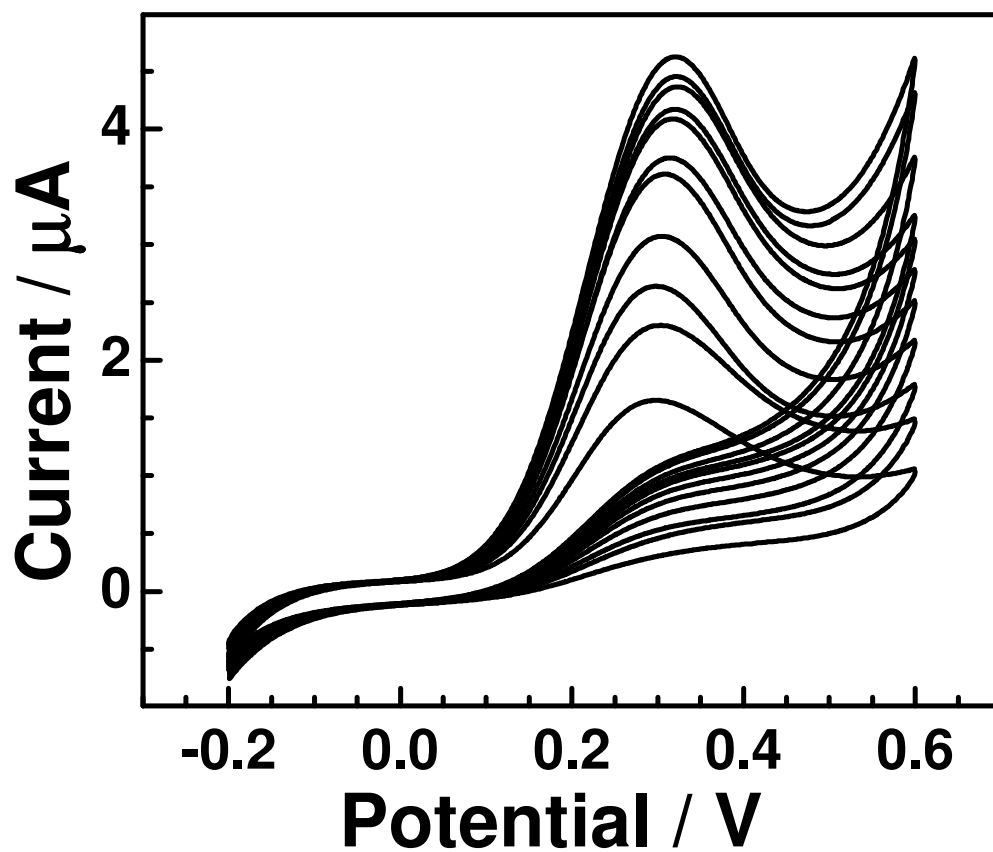

**Fig. S4:** Cyclic voltammograms of GC/MSS-Co(salophen) electrode with different concentrations of HZ (100.0, 150.0, 200.0, 250.0, 300.0, 350.0, 400.0, 450.0, 600.0, 800.0 and 900.0  $\mu\text{M}$ ).
